# Supplementary material for: Unraveling the coordination approach of Eu(iii) in cyphos nitrate ionic liquid – a comprehensive luminescence spectroscopy study
Source: Royal Society of Chemistry journal article supplement (doi:10.1039/d2dt00422d), 2022-01-01
Supplement: d2dt00422d1.pdf [file d2dt00422d1.pdf]

### Supplementary Information Sheet

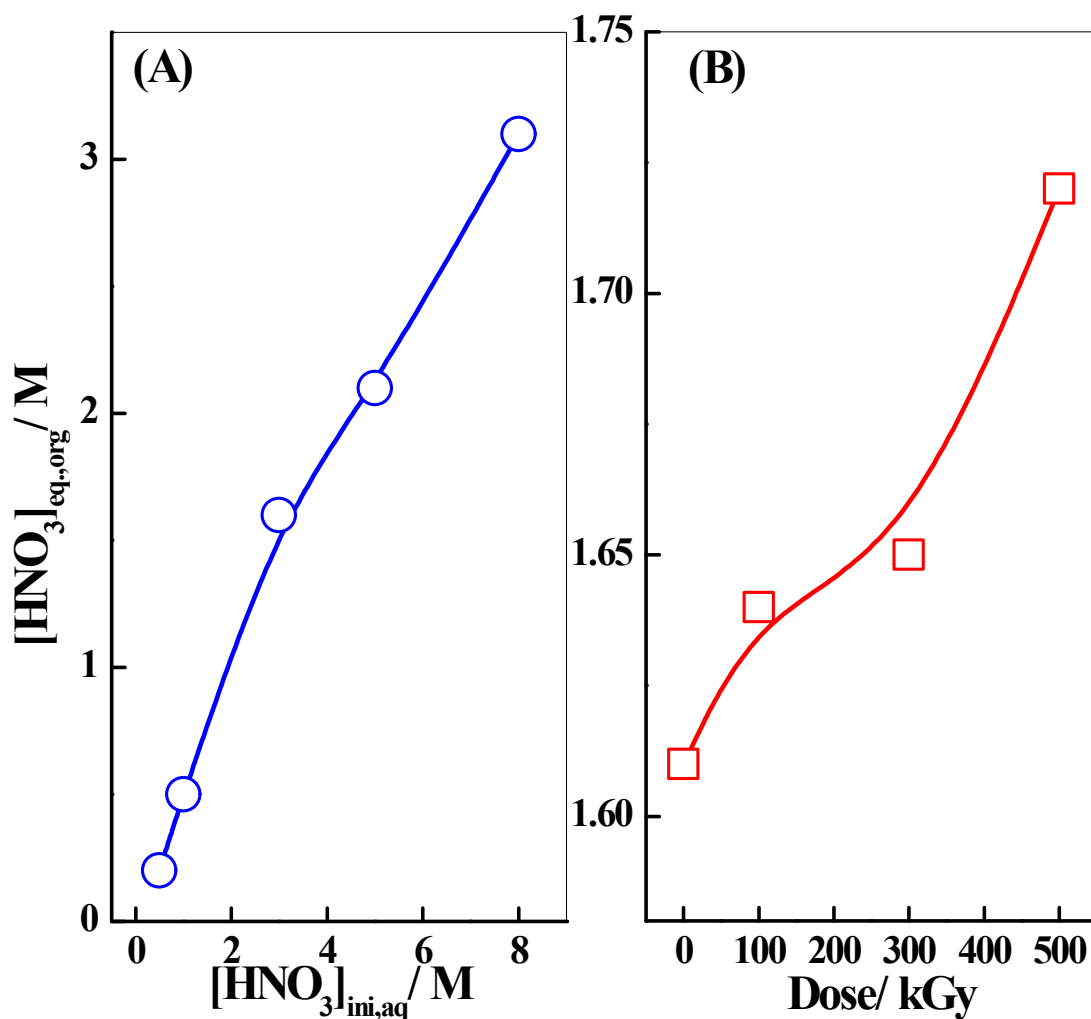

**Figure 1S.** Nitric acid extraction by  $[P_{66614}][NO_3]$ . Variation of the equilibrium concentration of nitric acid in ionic liquid phase as a function of initial concentration of nitric acid present in aqueous phase; Aqueous phase: 0.5 M - 8 M nitric acid; Temperature=298 K; Equilibration time = 1 hour; O/A = (A); Variation of the equilibrium concentration of nitric acid in ionic liquid phase as a function of applied radiation dose; Aqueous phase: 3 M nitric acid; applied dose = 0 kGy - 500 kGy; Temperature=298 K; Equilibration time = 1 hour; O/A = 1(B).

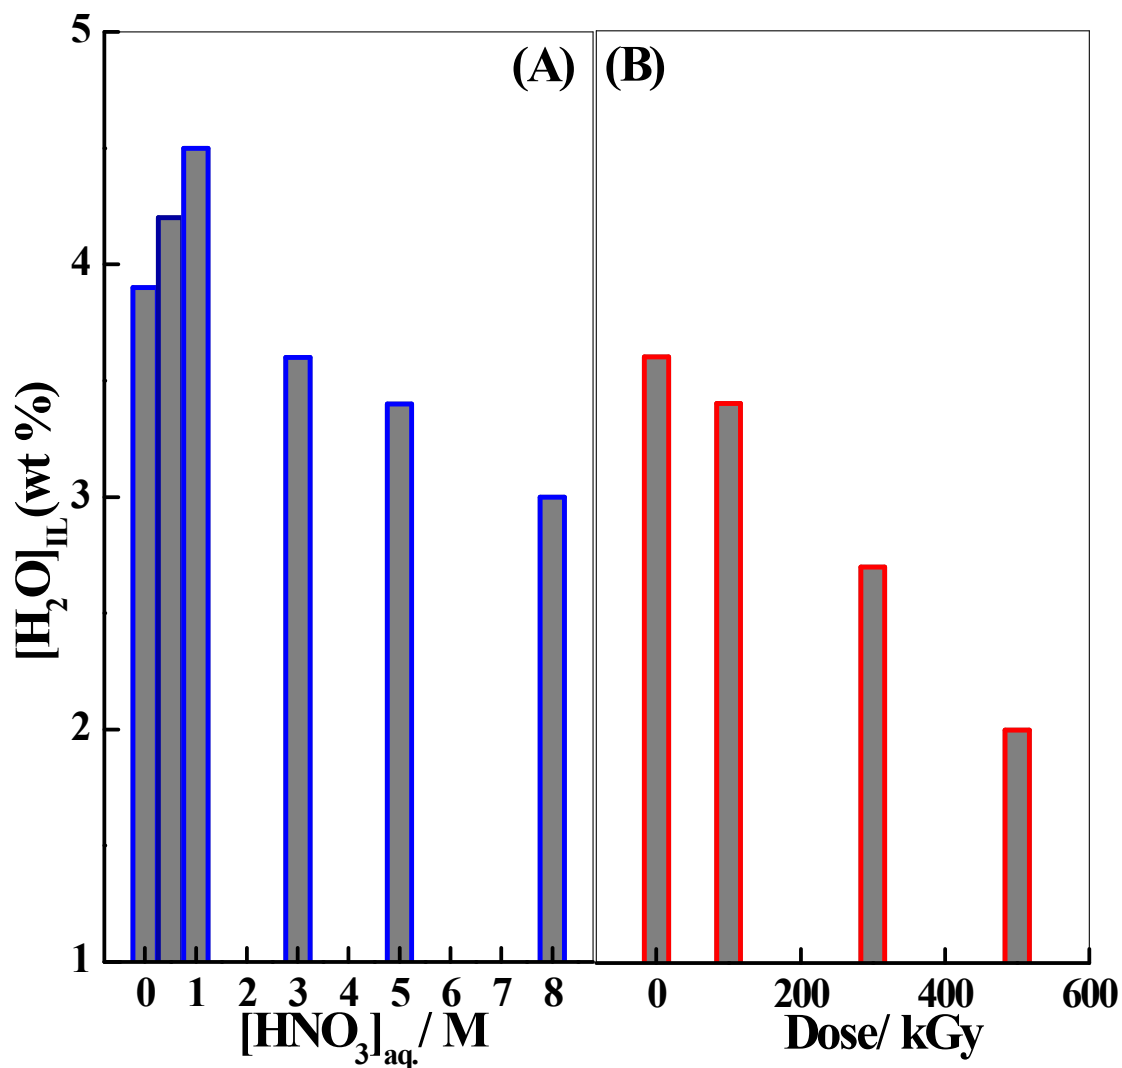

**Figure 2S.** Water extraction by  $[P_{66614}][NO_3]$ . Variation of the equilibrium concentration of water in ionic liquid phase as a function of initial concentration of nitric acid present in aqueous phase; Aqueous phase: 0.5 M - 8 M nitric acid; Temperature=298 K; Equilibration time = 1 hour; O/A = (A); Variation of the equilibrium concentration of water in ionic liquid phase as a function of applied radiation dose; Aqueous phase: 3 M nitric acid; applied dose = 0 kGy - 500 kGy; Temperature=298 K; Equilibration time = 1 hour; O/A = 1(B).
